# Supplementary material for: Individual and combined effects of DNA methylation and copy number alterations on miRNA expression in breast tumors
Source: PubMed Central journal article supplement (PMC4053776; doi:10.1186/gb-2013-14-11-r126), 2013-11-20

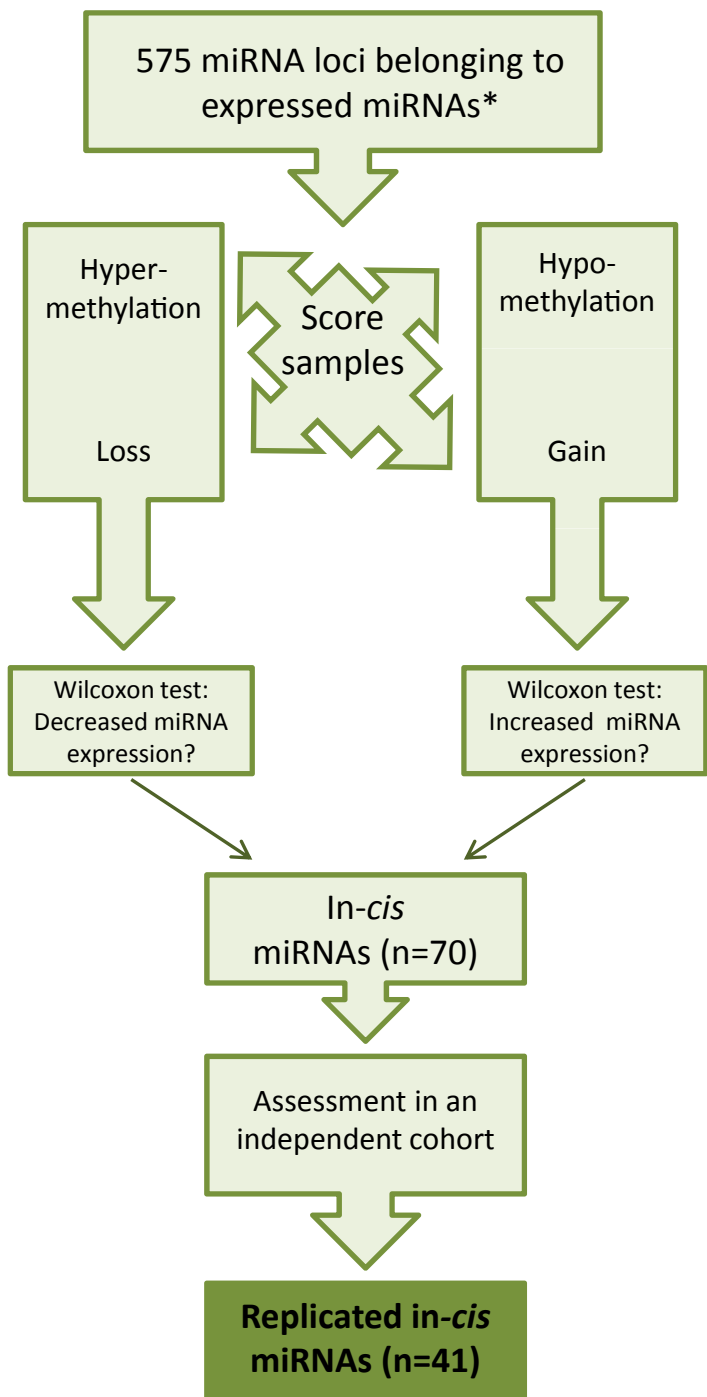

Supplement: gb-2013-14-11-r126-S2.pdf [file gb-2013-14-11-r126-S2.pdf]
